# Supplementary material
Source: Springer Nature journal article supplement (https://www.springermedizin.de/resource/supplementary/12916_2011_506_MOESM1_ESM.pdf/9598044)

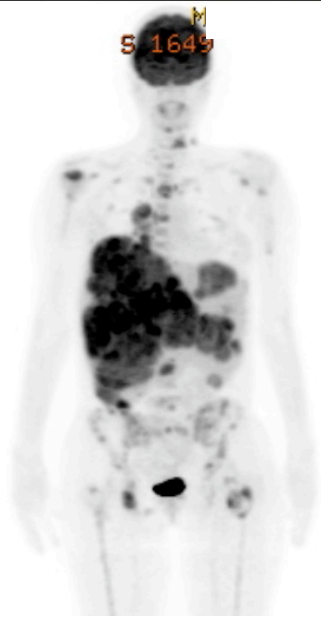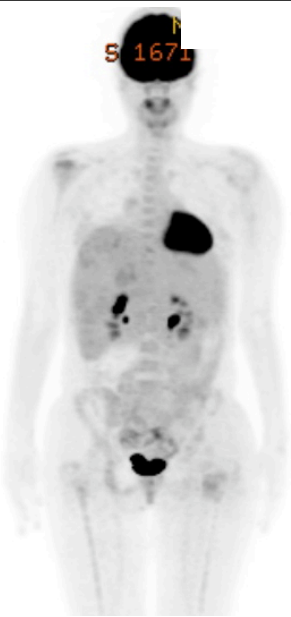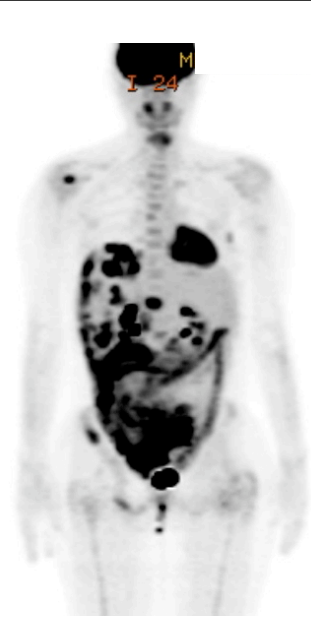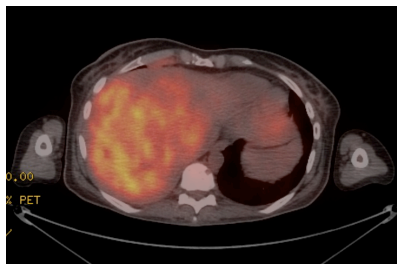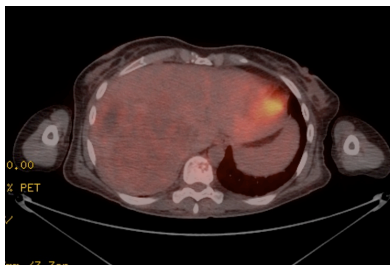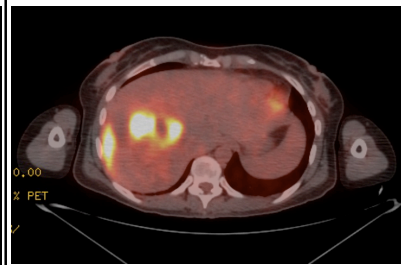

Baseline

2 weeks

6 months

Supplement: MOESM1 [file 9598044]
